# Supplementary material
Source: PubMed Central journal article supplement (PMC7418341)
Supplement: ONCO-25-696-s001.pdf [file ONCO-25-696-s001.pdf]

Supplemental Tables for:  
Immune checkpoint inhibitors associated primary adrenal insufficiency - WHO Vigibase report analysis  
Virginie Grouthier et al.

## Supplemental data

**Table S1: MedDRA terms used to discriminate definite versus possible PAI**

**Table S2: Clinical characteristics of patients with ICI associated definite (n=45) versus possible (n=406) PAI collected from Vigibase (last accessed: 10/2018).**

**Table S3: Drugs involved in and outcomes of ICI therapies inducing definite (n=45) versus possible PAI (n=406).**

Table S1: MedDRA terms used to discriminate definite versus possible PAI

| <u>Definite PAI (n=45)</u>                                                                                                                                                                                                                  | <u>Possible PAI (n=406)</u>                                                                                                                                                                                                                                                                                   |
|---------------------------------------------------------------------------------------------------------------------------------------------------------------------------------------------------------------------------------------------|---------------------------------------------------------------------------------------------------------------------------------------------------------------------------------------------------------------------------------------------------------------------------------------------------------------|
| <i>After exclusion of “secondary adrenocortical insufficiency”, “adrenocorticotrophic hormone deficiency”, “hypophysitis”, “blood corticotrophin decreased”, “hypopituitarism”, “hypothalamo-pituitary disorder” and their combination.</i> |                                                                                                                                                                                                                                                                                                               |
| <ul style="list-style-type: none"><li>• Addison’s disease</li><li>• Adrenalitis</li><li>• Adrenocortical insufficiency acute</li><li>• Adrenal insufficiency + hyponatremia + hyperkalemia</li></ul>                                        | <ul style="list-style-type: none"><li>• Adrenal insufficiency + hyponatremie + hypotension</li><li>• Adrenal insufficiency + dehydration + electrolyte imbalance (hyponatremia or hyperkalemia)</li><li>• Adrenal insufficiency + hyponatremia + digestive symptoms</li><li>• Adrenal insufficiency</li></ul> |

**Table S2: Clinical characteristics of patients with ICI associated definite (n:46) versus possible (n:406) PAI collected from VigiBase (last accessed: 10/2018).**

|                                                        | Definite PAI<br>n=45 | Possible PAI<br>n=406 | p                 |
|--------------------------------------------------------|----------------------|-----------------------|-------------------|
| <b>Reporting region (n (%))</b>                        |                      |                       |                   |
| Americas                                               | 15 (33.3%)           | 195 (48.1%)           | <b>&lt;0.0001</b> |
| Europe                                                 | 25 (55.6%)           | 91 (22.4%)            |                   |
| Australia                                              | 1 (2.2%)             | 7 (1.7%)              |                   |
| Asia                                                   | 4 (8.9%)             | 113 (27.8%)           |                   |
| <b>Reporters (n (%))</b>                               |                      |                       |                   |
| Health-care professional                               | 39 (86.7%)           | 325 (80.0%)           | <b>0.57</b>       |
| Non health-care professional                           | 4 (8.9%)             | 55 (13.6%)            |                   |
| Unspecified                                            | 2 (4.4%)             | 26 (6.4%)             |                   |
| <b>Reporting year (n (%))</b>                          |                      |                       |                   |
| 2018                                                   | 14 (31.0%)           | 155 (38.2%)           | <b>0.19</b>       |
| 2017                                                   | 19 (42.2%)           | 128 (31.5%)           |                   |
| 2016                                                   | 3 (6.7%)             | 50 (12.3%)            |                   |
| 2015                                                   | 3 (6.7%)             | 48 (11.8%)            |                   |
| 2014                                                   | 3 (6.7%)             | 10 (2.5%)             |                   |
| ≤ 2013                                                 | 3 (6.7%)             | 15 (3.7%)             |                   |
| <b>Sex (n (%))</b>                                     |                      |                       |                   |
| Female                                                 | 17 (37.8%)           | 144 (35.5%)           | <b>0.5</b>        |
| Male                                                   | 27 (60%)             | 235 (57.9%)           |                   |
| Unspecified                                            | 1 (2.2%)             | 27 (6.6%)             |                   |
| <b>Age at onset, years. median (range max) (n=369)</b> |                      |                       |                   |
|                                                        | 64 (33-87)<br>n=36   | 66 (30-95)<br>n=336   | <b>0.28</b>       |

---

| <b>Indication of ICI (n (%))</b> |                   |                    |             |
|----------------------------------|-------------------|--------------------|-------------|
| <b>Skin cancer</b>               | <b>18 (40.0%)</b> | <b>168 (41.3%)</b> | <b>0.44</b> |
| <b>Lung cancer</b>               | <b>9 (20.0%)</b>  | <b>120 (29.6%)</b> |             |
| <b>Renal cancer</b>              | <b>5 (11.1%)</b>  | <b>26 (6.4%)</b>   |             |
| <b>Gastrointestinal cancer</b>   | <b>0 (0.0%)</b>   | <b>6 (1.4%)</b>    |             |
| <b>Ovarian cancer</b>            | <b>1 (2.2%)</b>   | <b>1 (0.25%)</b>   |             |
| <b>Bladder cancer</b>            | <b>1 (2.2%)</b>   | <b>2 (0.5%)</b>    |             |
| <b>Pancreatic carcinoma</b>      | <b>0 (0.0%)</b>   | <b>2 (0.5%)</b>    |             |
| <b>Breast cancer</b>             | <b>0 (0.0%)</b>   | <b>3 (0.75%)</b>   |             |
| <b>Endometrial cancer</b>        | <b>0 (0.0%)</b>   | <b>3 (0.75%)</b>   |             |
| <b>Myeloma</b>                   | <b>1 (2.2%)</b>   | <b>2 (0.5%)</b>    |             |
| <b>Glioblastoma</b>              | <b>0 (0.0%)</b>   | <b>2 (0.5%)</b>    |             |
| <b>Hepatocellular cancer</b>     | <b>0 (0.0%)</b>   | <b>1 (0.25%)</b>   |             |
| <b>Pleural cancer</b>            | <b>0 (0.0%)</b>   | <b>3 (0.75%)</b>   |             |
| <b>Vulvar cancer</b>             | <b>0 (0.0%)</b>   | <b>2 (0.5%)</b>    |             |
| <b>Prostate cancer</b>           | <b>0 (0.0%)</b>   | <b>1 (0.25%)</b>   |             |
| <b>Testis cancer</b>             | <b>0 (0.0%)</b>   | <b>1 (0.25%)</b>   |             |
| <b>Hodgkin's disease</b>         | <b>0 (0.0%)</b>   | <b>1 (0.25%)</b>   |             |
| <b>Neoplasm of unknown sites</b> | <b>5 (11.1%)</b>  | <b>14 (3.5%)</b>   |             |
| <b>Data unspecified</b>          | <b>5 (11.1%)</b>  | <b>48 (11.8%)</b>  |             |

---

**Table S3: Drugs involved in and outcomes of ICI therapies inducing definite (n=45) versus possible PAI (n=406).**

|                                                                 | Definite PAI<br>n=45 | Possible PAI<br>n=406  | p     |      |
|-----------------------------------------------------------------|----------------------|------------------------|-------|------|
| <b>Suspected drugs (n(%))</b>                                   |                      |                        |       |      |
| Only ICI                                                        | 44 (97.8%)           | 353 (86.9%)            | 0.1   |      |
| ICI plus one other drug                                         | 1 (2.2%)             | 43 (10.6%)             |       |      |
| ICI plus two or more other drugs                                | 0 (0.0%)             | 10 (2.5%)              |       |      |
| <b>Drugs (n(%))</b>                                             |                      |                        |       |      |
| Monotherapy anti-PD1 or anti-PD-L1                              | 26 (57.8%)           | 238 (58.6%)            | 0.54  |      |
| Nivolumab                                                       | 18 (40.0%)           | 182 (44.9%)            |       |      |
| Pembrolizumab                                                   | 8 (17.8%)            | 45 (11.1%)             |       |      |
| Atezolizumab                                                    | 0 (0%)               | 7 (1.7%)               |       |      |
| Durvalumab                                                      | 0 (0%)               | 3 (0.7%)               |       |      |
| Avelumab                                                        | 0 (0%)               | 1 (0.2%)               |       |      |
| Monotherapy anti-CTL4 (ipilimumab)                              | 13 (28.9%)           | 93 (22.9%)             |       |      |
| Combination therapy                                             | 6 (13.3%)            | 75 (18.5%)             |       |      |
| Nivolumab + ipilimumab                                          | 6 (13.3%)            | 69 (17.0%)             |       |      |
| Pembrolizumab + ipilimumab                                      | 0 (0%)               | 5 (1.3%)               |       |      |
| Tremelimumab + Durvalumab                                       | 0 (0%)               | 1 (0.2%)               |       |      |
| <b>Time to irAE onset, days. median (range max)<br/>(n=119)</b> |                      |                        |       |      |
|                                                                 | 120 (6-506)<br>n=11  | 120,5 (6-576)<br>n=108 |       | 0.54 |
| <b>Drug dosing (n(%))</b>                                       |                      |                        |       |      |
| <b>Nivolumab</b>                                                |                      |                        |       |      |
| 1–2 mg/kg                                                       | 3/16 (18.7%)         | 51/181 (28.2%)         | 0.41  |      |
| ≥3 mg/kg                                                        | 13/16 (81.3%)        | 130/181 (71.8%)        |       |      |
| <b>Pembrolizumab</b>                                            |                      |                        |       |      |
| ≤2 mg/kg                                                        | 1/6 (16.7%)          | 11/25 (44.0%)          | 0.22  |      |
| >2 mg/kg                                                        | 5/6 (83.3%)          | 14/25 (56.0%)          |       |      |
| <b>Ipilimumab</b>                                               |                      |                        |       |      |
| <5 mg/kg                                                        | 8/11 (72.7%)         | 84/88 (95.5%)          | 0.006 |      |
| >5 mg/kg                                                        | 3/11 (27.3%)         | 4/88 (4.5%)            |       |      |
| <b>Severe adverse event (n(%))</b>                              | 45 (100%)            | 365 (89.9%)            | 0.03  |      |
| <b>Death (n(%))</b>                                             | 5 (11.1%)            | 28 (6.9%)              | 0.3   |      |
